# Supplementary material for: The OptimaMed intervention to reduce medication burden in nursing home residents with severe dementia: results from a pragmatic, controlled study
Source: Springer Nature journal article supplement (doi:10.1186/s12877-023-04222-4), 2023-08-28
Supplement: MOESM2 [file 25971112]

|                         |                    |                               |                  |
|-------------------------|--------------------|-------------------------------|------------------|
| Généralement appropriés | Parfois appropriés | Exceptionnellement appropriés | PAS DE CONSENSUS |
|-------------------------|--------------------|-------------------------------|------------------|

| A                                                         | page     |                                                   |          |
|-----------------------------------------------------------|----------|---------------------------------------------------|----------|
| <i>Abenol</i>                                             | 1        | <b>Antithyroïdiens</b>                            | <b>3</b> |
| <i>Abilify</i>                                            | 2        | <b>Antiviraux O.R.L.O.</b>                        | <b>2</b> |
| Acarbose                                                  | 3        | Apixaban                                          | 4        |
| <i>Accolate</i>                                           | 5        | <i>Apresoline</i>                                 | 4        |
| <i>Accupril</i>                                           | 2        | <i>ARICEPT</i>                                    | 5        |
| Acébutolol                                                | 2        | <i>Arimidex</i>                                   | 4        |
| Acétaminophène                                            | 1        | Aripiprazole                                      | 2        |
| acide acétylsalicylique                                   | 2        | <i>Arixtra</i>                                    | 4        |
| Acide tiaprofénique                                       | 4        | <i>Aspirine</i>                                   | 2        |
| Acide valproïque                                          | 1        | <i>Atacand</i>                                    | 2        |
| Acide zolédronique                                        | 5        | <i>Atarax</i>                                     | 4        |
| <i>Aclasta</i>                                            | 5        | <i>Atasol</i>                                     | 1        |
| <i>Actonel</i>                                            | 5        | Aténolol                                          | 2        |
| <i>Advagraf</i>                                           | 5        | <i>Ativan</i>                                     | 1        |
| <i>Advil</i>                                              | 5        | Atorvastatine                                     | 4        |
| <b>Agonistes α-adrénergiques</b>                          | <b>4</b> | <i>Atrovent</i>                                   | 4        |
| Alendronate                                               | 5        | <i>Avapro</i>                                     | 2        |
| Alendronate/cholécalférol                                 | 5        | <i>AXID</i>                                       | 5        |
| Alfuzosine                                                | 2        | Azathioprine                                      | 5        |
| Allopurinol                                               | 3        | <i>Azopt</i>                                      | 3        |
| <i>Alphagan</i>                                           | 2        | <b>B</b>                                          |          |
| <i>Altace</i>                                             | 2        | <i>Béclocort</i> (inhalateur)                     | 3        |
| Amiloride                                                 | 2        | Béclométhasone (ORLO)                             | 3        |
| Amiodarone                                                | 4        | <i>Benadryl</i>                                   | 4        |
| Amitriptyline                                             | 5        | Bénazépril                                        | 2        |
| Amlodipine                                                | 2        | <b>Benzodiazépines</b>                            | <b>1</b> |
| <b>Analgésiques narcotiques</b>                           | <b>1</b> | <b>Bêta-bloquants</b>                             | <b>2</b> |
| <i>Anandron</i>                                           | 4        | Betaxolol                                         | 2        |
| Anastrozole                                               | 4        | <i>Betoptic</i>                                   | 2        |
| <i>Andriol</i>                                            | 5        | Bezafibrate                                       | 4        |
| <i>Androcur</i> (anti-androgène)                          | 4        | <i>Bezalip</i>                                    | 4        |
| <i>Androderm</i>                                          | 5        | Bicalutamide                                      | 4        |
| <i>AndroGel</i>                                           | 5        | <b>Biguanides</b>                                 | <b>3</b> |
| <b>Androgènes</b>                                         | <b>5</b> | Bimatoprost                                       | 3        |
| <i>Ansaid</i>                                             | 5        | Bisoprolol                                        | 2        |
| <b>Antagonistes de vitamine K</b>                         | <b>4</b> | <b>Bisphosphonates</b>                            | <b>5</b> |
| <b>Antagonistes des récepteurs de l'angiotensine</b>      | <b>2</b> | <b>Bloquants du canal calcique</b>                | <b>2</b> |
| <b>Antagonistes des récepteurs des leucotriènes</b>       | <b>5</b> | <b>Bloquants alpha-adrénergiques urosélectifs</b> | <b>2</b> |
| ANTAGONISTES DES RÉCEPTEURS H <sub>2</sub> DE L'HISTAMINE | 5        | <i>Bricanyl</i>                                   | 1        |
| <b>Antiarythmiques classe I &amp; III</b>                 | <b>4</b> | Brimonidine                                       | 3        |
| <b>Antibactériens oraux</b>                               | <b>2</b> | Brinzolamide                                      | 3        |
| <b>Anticonvulsivants</b>                                  | <b>1</b> | <b>Bronchodilatateurs inhalés</b>                 | <b>1</b> |
| <b>Antidépresseurs (non TCA)</b>                          | <b>2</b> | Budésonide (ORLO)                                 |          |
| <b>Antidépresseurs TCA</b>                                | <b>5</b> | <b>C</b>                                          |          |
| <b>Antidiarrhéiques</b>                                   | <b>3</b> | Candésartan                                       | 2        |
| <b>Antifongiques topiques</b>                             | <b>1</b> | <i>Canesten</i> (topique)                         | 1        |
| <b>Antihistaminiques 1<sup>e</sup> génération</b>         | <b>4</b> | <i>CAPSAÏCINE</i>                                 | 5        |
| <b>Antihistaminiques 2<sup>e</sup> génération</b>         | <b>2</b> | Carbachol                                         | 3        |
| <b>Anti-infectieux O.R.L.O.</b>                           | <b>2</b> | Carbamazépine                                     | 1        |
| <b>Anti-inflammatoires non stéroïdiens</b>                | <b>4</b> | <i>Cardizem</i>                                   | 2        |
| <b>Antinéoplasiques</b>                                   | <b>4</b> | Carvédilol                                        | 2        |
| <b>Antipsychotiques</b>                                   | <b>2</b> | <i>Casodex</i>                                    | 4        |
| <b>Antispasmodiques</b>                                   | <b>4</b> | <i>Catapres</i>                                   | 4        |
|                                                           |          | <i>Celebrex</i>                                   | 4        |
|                                                           |          | Célécoxib                                         | 4        |
|                                                           |          | <i>Cellexa</i>                                    | 2        |
|                                                           |          | Chlorambucil                                      | 4        |
|                                                           |          | Chlorthalidone                                    | 2        |
|                                                           |          | <i>Cholestyramine</i>                             | 4        |
|                                                           |          | Ciclopirox olamine (topique)                      | 1        |
|                                                           |          | Cilazapril                                        | 2        |
|                                                           |          | <i>CIMÉTIDINE</i>                                 | 5        |
|                                                           |          | Citalopram                                        | 2        |
|                                                           |          | <i>Claritin</i>                                   | 2        |
|                                                           |          | <i>Clinoril</i>                                   | 4        |
|                                                           |          | <i>Clomid</i>                                     | 5        |
|                                                           |          | Clomifène                                         | 5        |
|                                                           |          | Clonidine                                         | 4        |
|                                                           |          | Clopidogrel                                       | 4        |
|                                                           |          | <i>Clotrimazole</i> (topique)                     | 1        |
|                                                           |          | Clotrimazole (topique)                            | 1        |
|                                                           |          | Clozapine                                         | 2        |
|                                                           |          | <i>Clozaril</i>                                   | 2        |
|                                                           |          | Codéine                                           | 1        |
|                                                           |          | Colchicine                                        | 4        |
|                                                           |          | <i>Colestid</i>                                   | 4        |
|                                                           |          | Colestipol                                        | 4        |
|                                                           |          | <b>Collyres anti-glaucome</b>                     | <b>3</b> |
|                                                           |          | <b>Collyres lubrifiants</b>                       | <b>1</b> |
|                                                           |          | <i>Cordarone</i>                                  | 4        |
|                                                           |          | <i>Coreg</i>                                      | 2        |
|                                                           |          | <i>Cortef</i> (oral)                              | 3        |
|                                                           |          | <b>Corticostéroïdes</b>                           | <b>3</b> |
|                                                           |          | Cortisone (oral)                                  | 3        |
|                                                           |          | <i>Cortone</i> (oral)                             | 3        |
|                                                           |          | <i>Coumadin</i>                                   | 4        |
|                                                           |          | <i>Coversyl</i>                                   | 2        |
|                                                           |          | <i>Cozaar</i>                                     | 2        |
|                                                           |          | <i>Crestor</i>                                    | 4        |
|                                                           |          | <i>Cyclomen</i>                                   | 5        |
|                                                           |          | Cyclophosphamide                                  | 5        |
|                                                           |          | Cyclosporine                                      | 5        |
|                                                           |          | Cyprotérone*                                      | 4        |
|                                                           |          | <b>D</b>                                          |          |
|                                                           |          | Dabigatran                                        | 4        |
|                                                           |          | Daltéparine                                       | 4        |
|                                                           |          | Danazol                                           | 5        |
|                                                           |          | <i>Decadron</i> (oral)                            | 3        |
|                                                           |          | <i>Depakene</i>                                   | 1        |
|                                                           |          | <i>Detrol</i>                                     | 5        |
|                                                           |          | Dexaméthasone                                     | 3        |
|                                                           |          | <i>Dexilant</i>                                   | 3        |
|                                                           |          | Dexlansoprazole                                   | 3        |
|                                                           |          | <i>Diabeta</i>                                    | 3        |
|                                                           |          | <i>Diamicron</i>                                  | 3        |
|                                                           |          | Diclofénac                                        | 4        |
|                                                           |          | Diflunisal                                        | 4        |
|                                                           |          | Digoxine                                          | 4        |
|                                                           |          | <i>Dilaudid</i>                                   | 1        |
|                                                           |          | Diltiazem                                         | 2        |
|                                                           |          | Dimenhydrinate                                    | 3        |
|                                                           |          | <i>Diovan</i>                                     | 2        |
|                                                           |          | Diphenhydramine                                   | 4        |
|                                                           |          | <i>Ditropan</i>                                   | 5        |

|                               |          |
|-------------------------------|----------|
| <b>Diurétiques</b>            | <b>2</b> |
| Divalproex                    | 1        |
| <b>Dolobid</b>                | <b>4</b> |
| DONEPEZIL                     | 5        |
| Dorzolamide                   | 3        |
| Duragésic                     |          |
| <b>E</b>                      |          |
| EBIXA                         | 5        |
| Effexor                       | 2        |
| Elavil                        | 5        |
| Eliquis                       | 4        |
| Eltroxin                      | 3        |
| Enoxaparine                   | 4        |
| Epival                        | 1        |
| Eprosartan                    | 2        |
| Eslon                         | 1        |
| Esoméprazole                  | 3        |
| Estrace                       | 5        |
| Estradiol                     | 5        |
| Estrogènes conjuguées         | 5        |
| Étodolac                      | 4        |
| Euflex                        | 4        |
| EXELON                        | 5        |
| <b>F</b>                      |          |
| FAMOTIDINE                    | 5        |
| Félodipine                    | 2        |
| Feno                          | 4        |
| Fénofibrate                   | 4        |
| Fentanyl                      | 1        |
| Flarex                        | 3        |
| Flomax                        | 3        |
| Flonase                       | 3        |
| Fluorométholone               | 3        |
| Flurbiprofène                 | 4        |
| Flutamide                     | 4        |
| Fluticasone                   | 3        |
| Fluvastatine                  | 4        |
| Fluvoxamine                   | 2        |
| FML                           | 3        |
| Fondaparinux                  | 4        |
| Formotérol (inhalateur)       | 1        |
| Fosamax                       | 5        |
| Fosavance                     | 5        |
| Fosinopril                    | 2        |
| Fragmin                       | 4        |
| Fraxiparine                   | 4        |
| Furosémide                    | 2        |
| <b>G</b>                      |          |
| Gabapentine (au cas par cas)  | 1        |
| GALANTAMINE                   | 5        |
| Gemfibrozil                   | 4        |
| Gen Teal                      | 1        |
| Gliclazide                    | 3        |
| Glucobay                      | 3        |
| Glucophage                    | 3        |
| Glyburide                     | 3        |
| Glycopyrrolate (injectable)   | 4        |
| Glycopyrronium (inhalateur)   | 4        |
| Gravol                        | 3        |
| <b>H</b>                      |          |
| Haldol                        | 2        |
| Halopéridol                   | 2        |
| Héparine                      | 4        |
| <b>Hormones thyroïdiennes</b> | <b>3</b> |

|                                                   |          |
|---------------------------------------------------|----------|
| Hydralazine                                       | 4        |
| Hydréa                                            | 4        |
| Hydrochlorothiazide                               | 2        |
| Hydrocortisone (oral)                             | 3        |
| Hydrodiuril                                       | 2        |
| Hydromorphone                                     | 1        |
| Hydroxyurée                                       | 4        |
| Hydroxyzine                                       | 4        |
| <b>Hypoglycémiant oraux</b>                       | <b>3</b> |
| <b>Hypolipémiants</b>                             | <b>4</b> |
| <b>I</b>                                          |          |
| Ibuprofen                                         | 4        |
| Imdur                                             | 2        |
| <b>Immunosuppresseurs</b>                         | <b>5</b> |
| Imodium                                           | 3        |
| Imuran                                            | 5        |
| Indapamide                                        | 2        |
| Inhibace                                          | 2        |
| INHIBITEURS DE L'ACÉTYLCHOLINESTÉRISE             | 5        |
| <b>Inhibiteurs de l'HMG-COA réductase</b>         | <b>4</b> |
| <b>Inhibiteurs de neuramididase oraux</b>         | <b>2</b> |
| <b>Inhibiteurs de la pompe à protons</b>          | <b>3</b> |
| <b>Inhibiteurs de la thrombine</b>                | <b>4</b> |
| <b>Inhibiteurs des α-glucosidases</b>             | <b>3</b> |
| <b>Inhibiteurs du facteur Xa</b>                  | <b>4</b> |
| <b>Inhibiteurs enzyme conversion angiotensine</b> | <b>2</b> |
| Innohep                                           | 4        |
| <b>Insulines</b>                                  | <b>3</b> |
| Ipratropium (inhalateur)                          | 4        |
| Irbesartan                                        | 2        |
| Isoptin                                           | 2        |
| <b>K</b>                                          |          |
| Kadian                                            | 1        |
| Keppra                                            | 1        |
| Kétoconazole (topique)                            | 1        |
| Ketoderm                                          | 1        |
| Kétoprofène                                       | 4        |
| <b>L</b>                                          |          |
| Labetolol                                         | 2        |
| Lamictal                                          | 1        |
| Lamotrigine                                       | 1        |
| Lanoxin                                           | 4        |
| Lansoprazole                                      | 3        |
| Lasix                                             | 2        |
| Latanoprost                                       | 3        |
| <b>Laxatifs</b>                                   | <b>3</b> |
| Lescol                                            | 4        |
| Leukeran                                          | 4        |
| Lévétiracétam                                     | 1        |
| Lévocabunolol                                     | 2        |
| Lévothyroxine                                     | 3        |
| Lipidil                                           | 4        |
| Lipitor                                           | 4        |
| Lisinopril                                        | 2        |
| Lopéramide                                        | 3        |
| Lopid                                             | 4        |
| Lopresor                                          | 2        |
| Loprox (topique)                                  | 1        |
| Loratadine                                        | 2        |
| Lorazepam                                         | 1        |
| Losartan                                          | 2        |
| Losec                                             | 3        |
| Lotensin                                          | 2        |
| Lovastatine                                       | 4        |

|                                 |          |
|---------------------------------|----------|
| Lovenox                         | 4        |
| Lozide                          | 2        |
| Lumigan                         | 3        |
| Luvox                           | 2        |
| Lyrica (au cas par cas)         | 1        |
| <b>M</b>                        |          |
| M.O.S                           | 1        |
| Mavik                           | 2        |
| Maxidex                         | 3        |
| Medrol (oral)                   | 3        |
| Méloxicam                       | 4        |
| MÉMANTINE                       | 5        |
| Metformine                      | 3        |
| Méthimazole                     | 3        |
| Méthylprednisolone (oral)       | 3        |
| Metolazone                      | 2        |
| Métoprolol                      | 2        |
| Mevacor                         | 4        |
| Micardis                        | 2        |
| Midamor                         | 2        |
| Minitran                        | 2        |
| Mirtazapine                     | 2        |
| Mobénol                         | 3        |
| Mobicox                         | 4        |
| Mométasone                      | 3        |
| Monitan                         | 2        |
| Monocor                         | 2        |
| Monopril                        | 2        |
| Montélukast                     | 5        |
| Morphine                        | 1        |
| Motrin                          | 4        |
| M-Slong                         | 1        |
| Mycophénolate                   | 5        |
| Myfortic                        | 5        |
| <b>N</b>                        |          |
| Nadroparine                     | 4        |
| Naprosyn                        | 4        |
| Naprox                          | 4        |
| Naproxène                       | 4        |
| <b>Narcotiques analgésiques</b> | <b>1</b> |
| Nasacort                        | 3        |
| Nasonex                         | 3        |
| Neoral                          | 5        |
| Neurontin (au cas par cas)      | 1        |
| Nexium                          | 3        |
| Nicoumalone                     | 4        |
| Nilutamide                      | 4        |
| <b>Nitrates</b>                 | <b>2</b> |
| Nitro                           | 2        |
| Nitrodur                        | 2        |
| Nitroglycérine                  | 2        |
| Nitrong (onguent)               | 2        |
| Nitropatch                      | 2        |
| Nix                             | 3        |
| NIZATIDINE                      | 5        |
| Norvasc                         | 2        |
| Novo-Gesic                      | 2        |
| Nyaderm                         | 1        |
| Nystatine (topique)             | 1        |
| <b>O</b>                        |          |
| Olanzapine                      | 2        |
| Olmésartan                      | 2        |
| Olmotec                         | 2        |

|                    |   |
|--------------------|---|
| Oméprazole         | 3 |
| <b>Orudis</b>      | 4 |
| Oseltamivir        | 2 |
| Oxazépam           | 1 |
| Oxeze (inhalateur) | 1 |
| <b>Oxybutinine</b> | 5 |
| Oxycodone          | 1 |
| Oxy-Contin         | 1 |
| Oxy-IR             | 1 |

**P**

|                              |   |
|------------------------------|---|
| Pantoloc                     | 3 |
| Pantoprazole                 | 3 |
| Pariet                       | 3 |
| Paroxetine                   | 3 |
| Paxil                        | 2 |
| PEPCID                       | 5 |
| Perindopril                  | 2 |
| Perméthrine                  | 3 |
| Pilocarpine                  | 3 |
| <b>Plavix</b>                | 4 |
| Plendil                      | 2 |
| <b>Pradaxa</b>               | 4 |
| Prandase                     | 3 |
| <b>Pravachol</b>             | 4 |
| <b>Pravastatine</b>          | 4 |
| Pred                         | 3 |
| Prednisolone (ORLO)          | 3 |
| Prednisone                   | 3 |
| Prégabaline (au cas par cas) | 1 |
| <b>Premarine</b>             | 5 |
| Prevacid                     | 3 |
| Prinivil                     | 2 |
| Prochlorpérazine             | 3 |
| <b>Procytox</b>              | 4 |
| <b>Prograf</b>               | 5 |
| Propafénone                  | 4 |
| Propylthiouracile            | 3 |
| PTU                          | 3 |
| Pulmicort (inhalateur)       | 3 |

**Q**

|                 |   |
|-----------------|---|
| <b>Questran</b> | 4 |
| Quétiapine      | 2 |
| Quinapril       | 2 |

**R**

|                 |   |
|-----------------|---|
| Rabéprazole     | 3 |
| Ramipril        | 2 |
| RANIDITINE      | 5 |
| Rapaflor        | 2 |
| <b>Rapamune</b> | 5 |
| Refresh         | 1 |
| Remeron         | 2 |
| REMINYL         | 5 |

|                             |   |
|-----------------------------|---|
| <b>Renidil</b>              | 2 |
| Restoril                    | 1 |
| Rhinocort                   | 3 |
| Rhotral                     | 2 |
| <b>Riséronate</b>           | 5 |
| Risperdal                   | 2 |
| Rispéridone                 | 2 |
| Rivanase                    | 3 |
| <b>Rivaroxaban</b>          | 4 |
| RIVASTIGMINE                | 5 |
| <b>Robinul (injectable)</b> | 4 |
| Rosuvastatine               | 4 |
| <b>Rythmol</b>              | 4 |

**S**

|                                      |   |
|--------------------------------------|---|
| Sabril                               | 1 |
| Salbutamol (inhalateur)              | 1 |
| Salmétérol (inhalateur)              | 1 |
| Salvent (inhalateur)                 | 1 |
| <b>Scabicides et pédiculicides</b>   | 3 |
| <b>Scopolamine (injectable)</b>      | 4 |
| Sectral                              | 2 |
| <b>Seebri (inhalateur)</b>           | 4 |
| Sérox                                | 1 |
| Serevent                             | 1 |
| Seroquel                             | 2 |
| Sertraline                           | 2 |
| Silodosine                           | 2 |
| Simvastatine                         | 4 |
| Singulier                            | 5 |
| Sintrom                              | 4 |
| Sirolius                             | 5 |
| Sotacor                              | 2 |
| Sotalol                              | 2 |
| <b>Spasmodiques génito-urinaires</b> | 5 |
| <b>Spiriva (inhalateur)</b>          | 4 |
| Statex                               | 1 |
| Stemetil                             | 3 |
| <b>Sulfonylurées</b>                 | 3 |
| Sulindac                             | 4 |
| Supeudol                             | 1 |
| <b>Surgam</b>                        | 4 |
| Synthroid                            | 3 |
| Systane                              | 1 |

**T**

|                   |   |
|-------------------|---|
| <b>Tacrolimus</b> | 5 |
| TAGAMET           | 5 |
| Tamiflu           | 2 |
| Tamsulosine       | 2 |
| Tapazole          | 3 |
| Tears natural II  | 1 |
| Tégréto           | 1 |
| Temazépam         | 1 |

|                                |   |
|--------------------------------|---|
| Temisartan                     | 2 |
| Temptra                        | 1 |
| Tenormin                       | 2 |
| <b>Tenoxicam</b>               | 4 |
| Terbutaline (inhalateur)       | 1 |
| <b>Testim</b>                  | 5 |
| <b>Testotérone</b>             | 5 |
| Teveten                        | 2 |
| Tiazac                         | 2 |
| Timolol                        | 2 |
| Timoptic                       | 2 |
| <b>Tinzaparine</b>             | 4 |
| <b>Tiotropium (inhalateur)</b> | 4 |
| Tolbutamide                    | 3 |
| <b>Toltérodine</b>             | 5 |
| Topamax                        | 1 |
| Topiramate                     | 1 |
| Trandate                       | 2 |
| Trandolapril                   | 2 |
| Travatan                       | 3 |
| Travoprost                     | 3 |
| Triamcinolon                   | 3 |
| Trifluridine                   | 2 |
| Trusopt                        | 2 |
| Tylenol                        | 1 |

**V**

|                                         |   |
|-----------------------------------------|---|
| Valproic                                | 1 |
| Valsartan                               | 2 |
| <b>Vasodilatateurs à action directe</b> | 4 |
| Venlafaxine                             | 2 |
| Ventolin                                | 1 |
| Vérapamil                               | 2 |
| Vigabatrin                              | 1 |
| Viroptic                                | 2 |
| VITAMINES                               | 5 |
| <b>Voltaren</b>                         | 4 |

**W**

|                  |   |
|------------------|---|
| <b>Warfarine</b> | 4 |
|------------------|---|

**X**

|                |   |
|----------------|---|
| Xalatan        | 3 |
| <b>Xarelto</b> | 4 |
| Xatral         | 2 |

**Z**

|                    |   |
|--------------------|---|
| <b>Zafirlukast</b> | 5 |
| ZANTAC             | 5 |
| Zaroxolyn          | 2 |
| Zestril            | 2 |
| <b>Zocor</b>       | 4 |
| Zolof              | 2 |
| Zyloprim           | 3 |
| Zyprexa            | 2 |
